# Supplementary material
Source: Royal Society of Chemistry journal article supplement (https://www.rsc.org/suppdata/cp/1999/2551/809333d.doc)
Supplement: Supplementary file 1 [file 809333d.doc]

deposited crystal structure data

VERS 90.1

PASS GENSTRU thioclor

AUTH R.M. Romano

C.O. Della Vedova*

R. Boese

P. Hildebrandt

SODA 1

=

Departamento de Quimica, Facultad de Ciencias Exactas

=

Universidad Nacional de La Plata, 47 esq.115

=

1900 La Plata

=

Republica Argentina

=

2

=

Departamento de Quimica, Facultad de Ciencias Exactas

=

Universidad Nacional de La Plata, 47 esq.115

=

1900 La Plata

=

Republica Argentina

=

3

=

Institut fuer Anorganische Chemie der Universitaet-GH

=

Universitaetsstr. 3-5

=

D-45117 Essen

=

Deutschland

=

4

=

Max-Planck-Institut fuer Strahlenchemie

=

Stiftstr. 34-36

=

D-45470 Muelheim an der Ruhr

=

Deutschland

TITL Studies on NSO-Containing Compounds: New Synthesis, Resonance Raman

=

Effect and Crystal Structure of ClC(O)SNSO"

PRJL 2 Eur. J. Chem.

CITA

REFS

SOMA 3 see proposed journal

SINA N-(sulfinylimine)chlorocarbonylsulfane

ALNA

FORM C Cl N O2 S2

OXST

MINA

MIDP

TEMP 2 125

SPGR 29 Pca2(1)

DTYP 2

RADI 2 0.7107300 0.7093000 0.7135900

CELL 0.0000 0.0000 0.0000 0.0000 0.0000 0.0000

CERR 0.0000 0.0000 0.0000 0.0000 0.0000 0.0000

NUMZ 4

ABST 0

DMEA -1.00000

CRYS 0.3 mm diameter cylindric

TDAT Wyckoff-scan

CDET 35 20.00 25.00

NMEA 2044

NUNI 1449

CUNR 1 4.0000

NOBS 1432

RMER 0.0281

NPAR 64

MAXT 60.00

ABSC 1

ABCO 1.40

EXTI 2 0.009 0.001

SCFA 0

RVAL 0.0325 0.0370

WGHS 2 0.0027

RESI 0.72

RIGI none

REMA The crystallization was perfomed on the diffractometer at a

temperatur=

of 271K with a miniature zone melting procedure with focussed

infrared=

light according to: D. Brodalla, D. Mootz, R. Boese, W. Osswald,

=

J. Appl. Cryst. 1985, 18, 316.

TITL C CL N O2 S2 Pca2(1) 125K

CELL 0.71073 13.8900 7.2858 5.1721 90.00 90.00 90.00

ZERR 4.00 0.0032 0.0023 0.0013 0.00 0.00 0.00

LATT -1

SYMM -X, -Y, .5+Z

SYMM .5+X, -Y, Z

SYMM .5-X, Y, .5+Z

SFAC C N O S CL

UNIT 4 4 8 8 4

WGHT 0.002689 2 0 0.0000

FVAR 0.97661 0.00896

S1 4 0.64823 0.16425 10.35160 11.00000 0.01891 0.01499 =

0.01654 -0.00352 -0.00329 0.00097

S2 4 0.61595 0.51503 0.55649 11.00000 0.01954 0.01564 =

0.02039 -0.00545 -0.00175 0.00449

CL 5 0.64389 -0.14284 0.01615 11.00000 0.02572 0.01753 =

0.02725 -0.00921 0.00322 -0.00109

O1 3 0.53667 0.14549 -0.06797 11.00000 0.02271 0.02685 =

0.02329 -0.00589 -0.00448 0.00125

O2 3 0.68448 0.46977 0.75941 11.00000 0.02524 0.02723 =

0.02427 -0.00858 -0.00584 0.00464

N 2 0.59445 0.36862 0.35138 11.00000 0.01652 0.01823 =

0.01819 -0.00440 -0.00158 0.00250

C 1 0.59471 0.07816 0.07039 11.00000 0.01372 0.01856 =

0.01561 -0.00437 0.00252 -0.00328

END
